# Supplementary material for: Loss Assessment during Postharvest and Handling of Thai Garlic Used for Processing
Source: MDPI journal article supplement (doi:10.3390/horticulturae9040482), 2023-04-12
Supplement: s1 [file s1]

**Supplement Table S1.** Losses production of garlic.

| <b>Stages</b> | <b>Causes of loss</b>      | <b>Causes</b>                                                                                   | <b>Loss components</b>           |
|---------------|----------------------------|-------------------------------------------------------------------------------------------------|----------------------------------|
| Preharvest    | Plant diseases             | Black mould, rust, and fusarium rot                                                             | Plant (yield and quality losses) |
|               | Pest                       | Bulb mites, thrips, and whiteflies                                                              | Plant (yield and quality losses) |
|               | Environments               | Shortage of soil nutrients and fertilizer, drought, excessive rainfall, and extreme temperature | Plant (yield and quality losses) |
| Harvest       | Bulb stuck in the ground   |                                                                                                 | Plant, bulbs                     |
|               | Improper harvesting stages |                                                                                                 | Immature, over-mature bulbs      |
| Postharvest   | Physical losses            | Physical damage, spoilage of bulbs during transport                                             | Bulbs                            |
|               | Microbial spoilage         | Bacteria, yeast, and fungi                                                                      | Leaves, roots and skin           |
|               | Pest infestation           | Bulb mites, thrips, and whiteflies                                                              | Bulbs, moisture content          |
|               | Storage losses             | Temperature, humidity                                                                           | Moisture                         |
